# Supplementary material for: Development of molecularly imprinted polymers for the detection of human chorionic gonadotropin
Source: Springer Nature journal article supplement (doi:10.1038/s41598-025-94289-3), 2025-03-26
Supplement: MOESM1 [file 41598_2025_94289_MOESM1_ESM.pdf]

## **Supporting Information**

### **Development of Molecularly Imprinted Polymers for the Detection of Human Chorionic Gonadotropin**

Radvile Zubryté, Liliia Mavliutova, Yadiris García, Mark V. Sullivan, Nicholas W. Turner,  
Francesco Patitucci, Laura C. Polania, Verónica A. Jiménez, Robert Porter, Alice Mattsson  
and Börje Sellergren\*

## Supporting Tables

**Table S1. Epitope properties**

| Sequence               | Sequence length | Hydrophobicity | GRAVY | Mw average (g/mol) | Theoretical pI |
|------------------------|-----------------|----------------|-------|--------------------|----------------|
| <b>SIRLPGCPRGVNPVV</b> | 15              | 28             | 0.30  | 1564               | 10.9           |
| <b>PGPSDTPILPQ</b>     | 11              | 23             | -0.64 | 1121               | 3.1            |

a) <https://www.thermofisher.com/se/en/home/life-science/protein-biology/peptides-proteins/custom-peptide-synthesis-services/peptide-analyzing-tool.html>

**Table S2. Functional monomer feed ratio (mole %) used for MIP synthesis.**

| Entry         | NIPAm | BIS | TBAm | APM | AAc | FITC-AAm |
|---------------|-------|-----|------|-----|-----|----------|
| <b>MIP-SV</b> | 45    | 5   | 40   | 5   | 5   | 0.8 mg   |
| <b>MIP-PQ</b> | 48    | 2   | 40   | 10  | 0   | 0.4 mg   |

## Supporting Figures

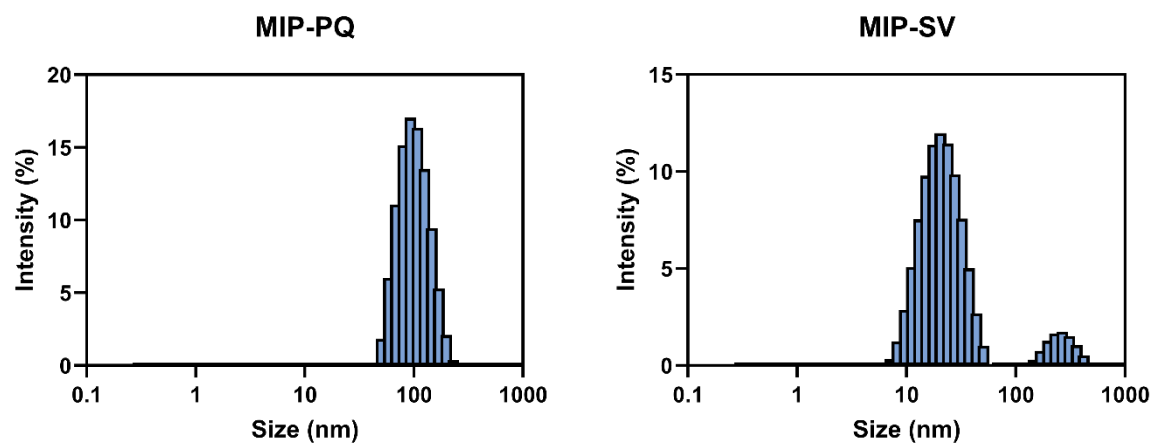

**Figure S1.** DLS size distribution of MIP-SV and MIP-PQ.

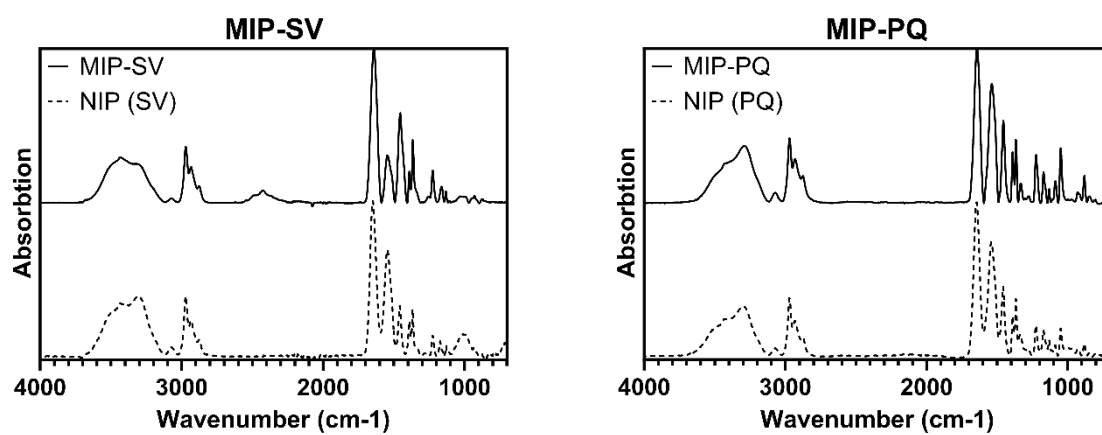

**Figure S2.** Fourier transform infrared (FTIR) spectroscopy of MIP-SV and MIP-PQ and corresponding NIPs.

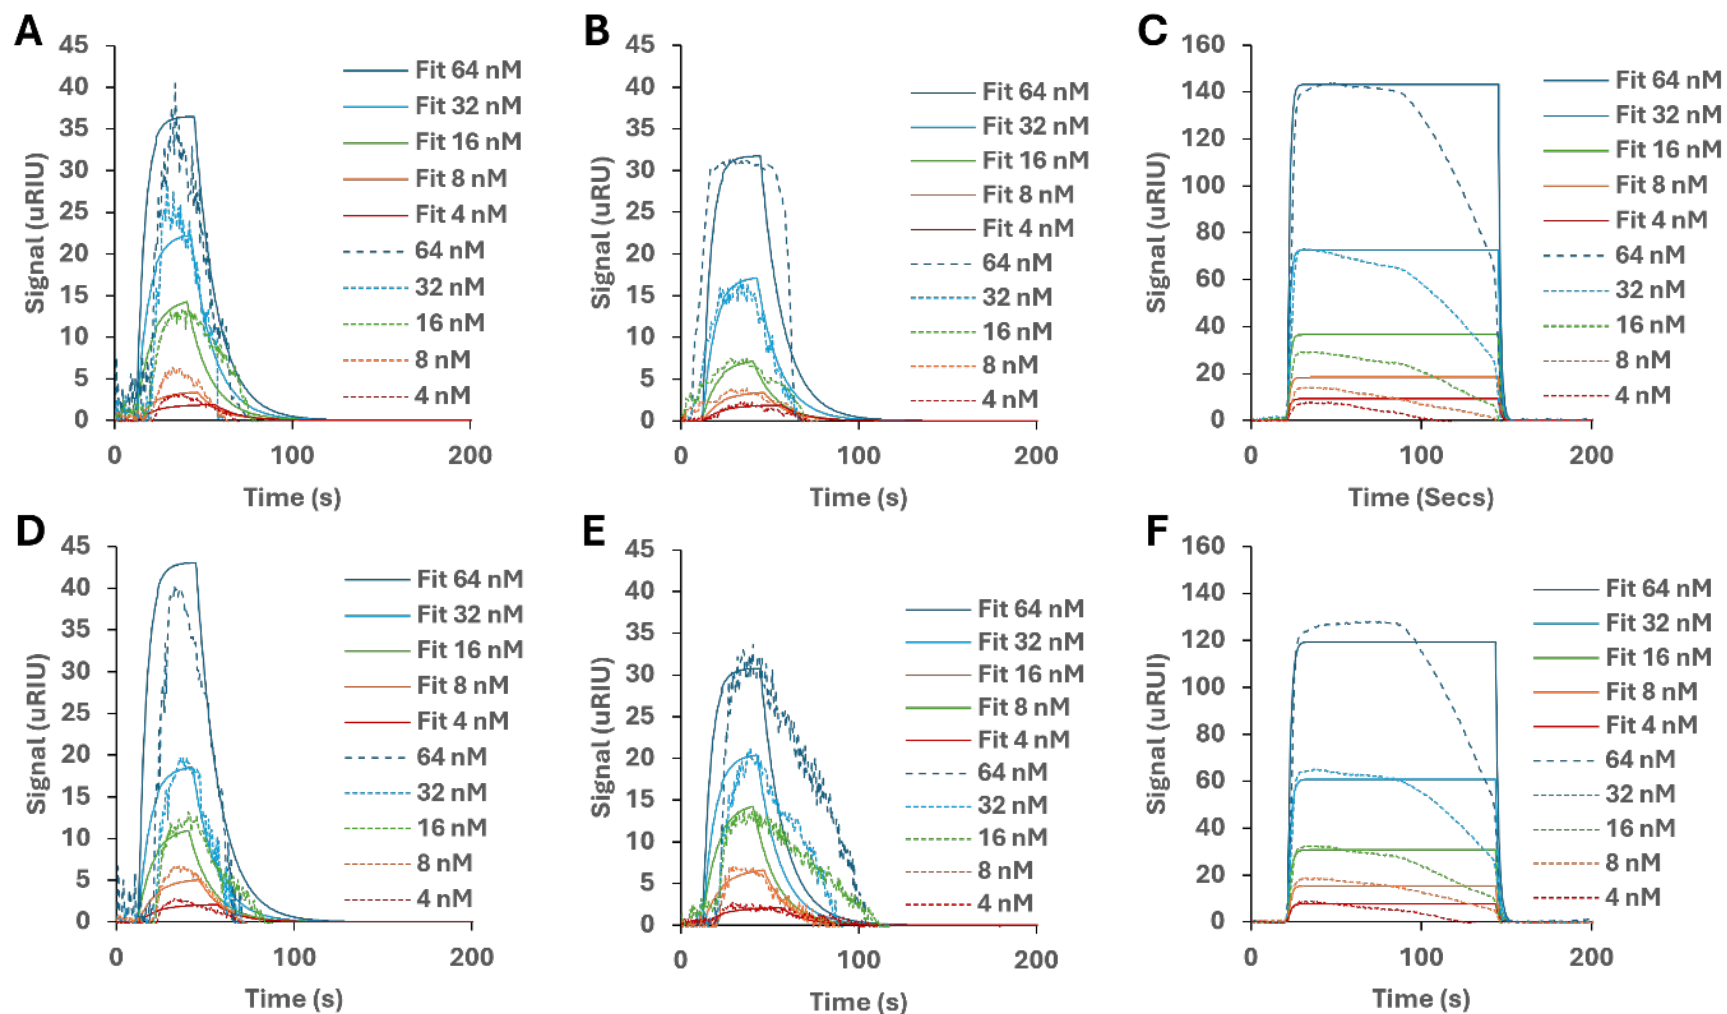

**Figure S3.** Representative fitted SPR curves showing the rebinding of the target and non-target peptides to the immobilized nanogel with five concentrations of the analyte in PBST. (A-C) SV, PQ and hCG binding to MIP-SV; (D-F) PQ, SV and hCG binding to MIP-PQ.

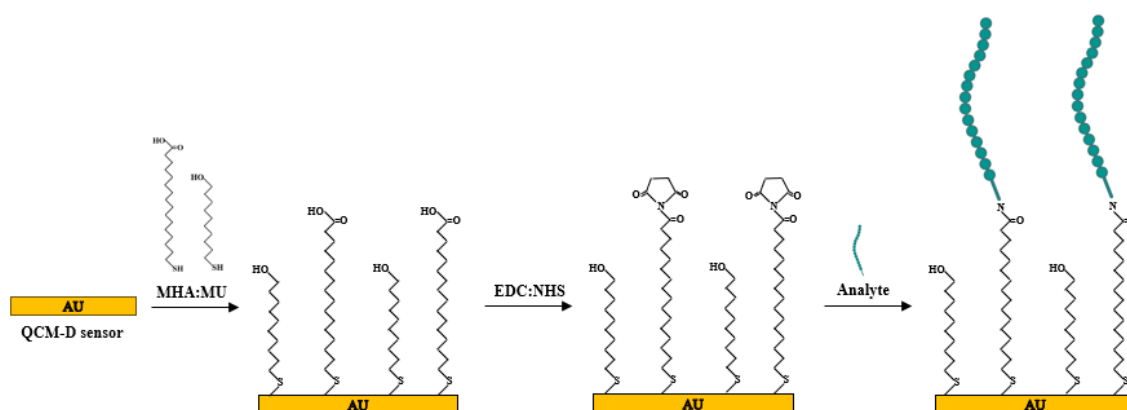

**Figure S4.** The process of QCM sensor chip modification with the target peptide.

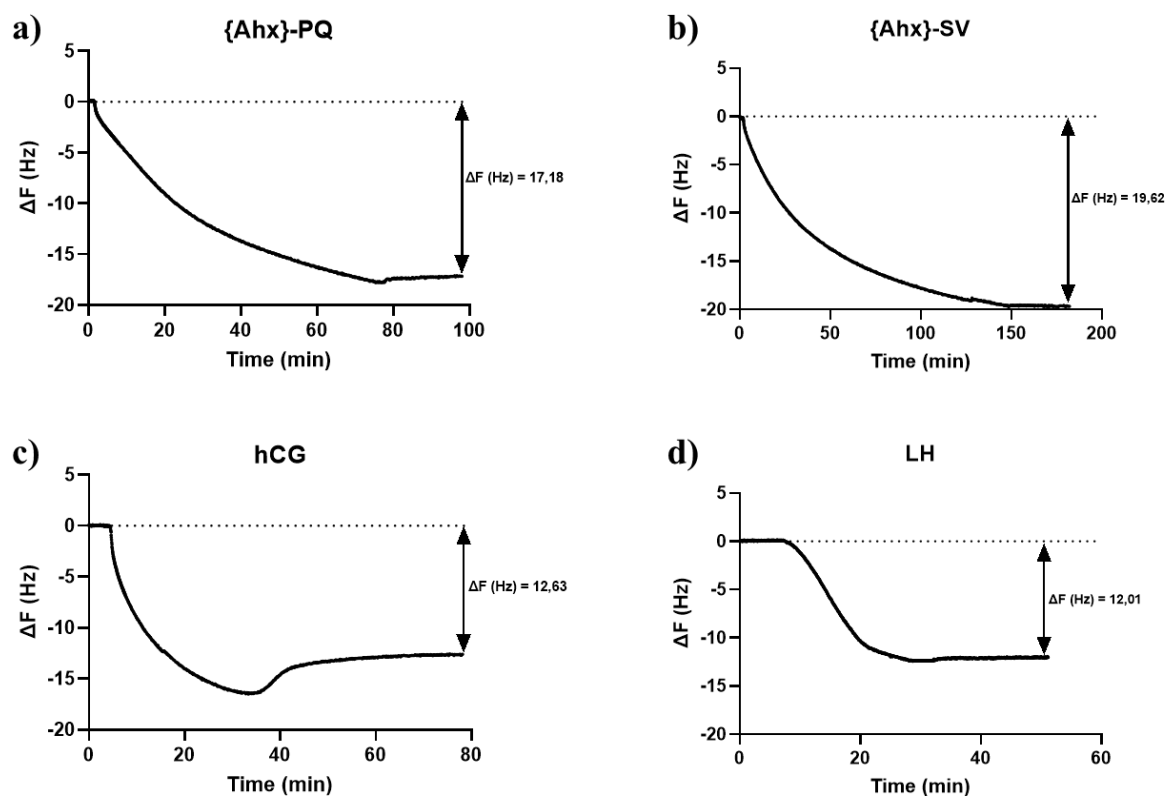

**Figure S5.** Analyses of QCM-D sensor modification with a) Ahx-PQ, b) Ahx-SV, c) hCG and d) LH. Ahx-PQ and Ahx-SV are the PQ and SV peptides conjugated with the N-acetylated-6-aminohexanoyl (Ahx) moiety at the N-termini.
